# Supplementary material for: Hollow-core optical fibre sensors for operando Raman spectroscopy investigation of Li-ion battery liquid electrolytes
Source: PubMed Central journal article supplement (PMC8960792; doi:10.1038/s41467-022-29330-4), 2022-03-28
Supplement: 41467_2022_29330_MOESM3_ESM.pdf [file 41467_2022_29330_MOESM3_ESM.pdf]

### **Descriptions of additional supplementary Information files**

Supplementary Movie 1 | Gas bubble trapped in a hollow-core fibre. Video of side-scattered 785 nm laser light from a gas bubble trapped in a hollow-core fibre during electrolyte extraction. The movie has been acquired using a 12 MP chargecoupled device (CCD) sensor. (i.e. mobile phone camera).
