# Supplementary material for: Hollow-core optical fibre sensors for operando Raman spectroscopy investigation of Li-ion battery liquid electrolytes
Source: Springer Nature journal article supplement (doi:10.1038/s41467-022-29330-4), 2022-03-28
Supplement: MOESM1 [file 41467_2022_29330_MOESM1_ESM.pdf]

## Supplementary Information

### Hollow-core optical fibre sensors for operando Raman spectroscopy investigation of Li-ion battery liquid electrolytes

Ermanno Miele,<sup>1,2,3</sup> Wesley M. Dose,<sup>2,3,4</sup> Ilya Manyakin,<sup>1</sup> Michael H. Frosz,<sup>5</sup> Zachary Ruff,<sup>2,3</sup> Michael F.L. De Volder,<sup>4,3</sup> Clare P. Grey,<sup>2,3\*</sup> Jeremy J. Baumberg,<sup>1,3\*</sup> and Tijmen G. Euser<sup>1,3\*</sup>

<sup>1</sup> Nanophotonics Centre, Department of Physics, Cavendish Laboratory, University of Cambridge, CB3 0HE, Cambridge, United Kingdom

<sup>2</sup> Department of Chemistry, University of Cambridge, Lensfield Road, CB2 1EW, Cambridge, UK

<sup>3</sup> The Faraday Institution, Quad One, Harwell Science and Innovation Campus, Didcot OX11 0RA, Oxford, UK

<sup>4</sup> Institute for Manufacturing, Department of Engineering, University of Cambridge, 17 Charles Babbage Road, CB3 0FS, Cambridge, UK

<sup>5</sup> Max Planck Institute for the Science of Light, Staudtstr. 2, 91058, Erlangen, Germany

\*e-mail: [te287@cam.ac.uk](mailto:te287@cam.ac.uk), [jib12@cam.ac.uk](mailto:jib12@cam.ac.uk), [cpg27@cam.ac.uk](mailto:cpg27@cam.ac.uk)

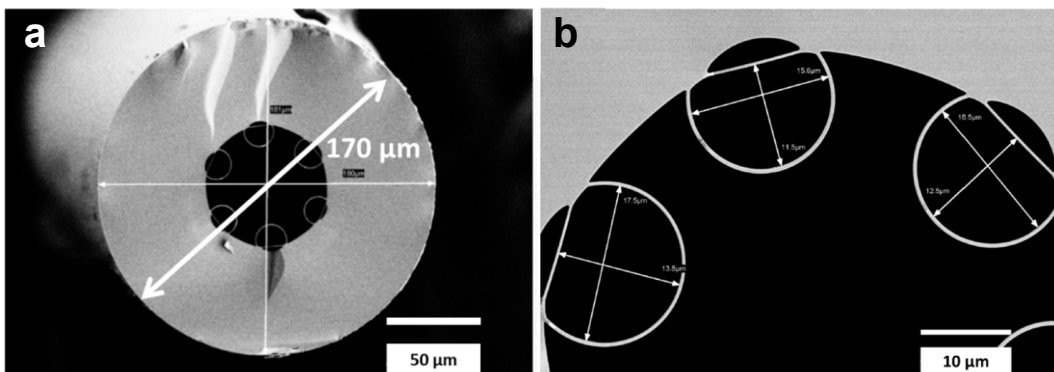

**Supplementary Figure 1 | SEM Images of hollow-core fibre.** (a) Fibre comprises a single ring negative curvature fibre with an outer diameter of 174 μm and an internal hollow-core diameter measuring 36 μm, with (b) 6 inner capillaries of 16 μm in diameter. The glass capillaries are made from Heraeus Suprasil 300 silica glass.

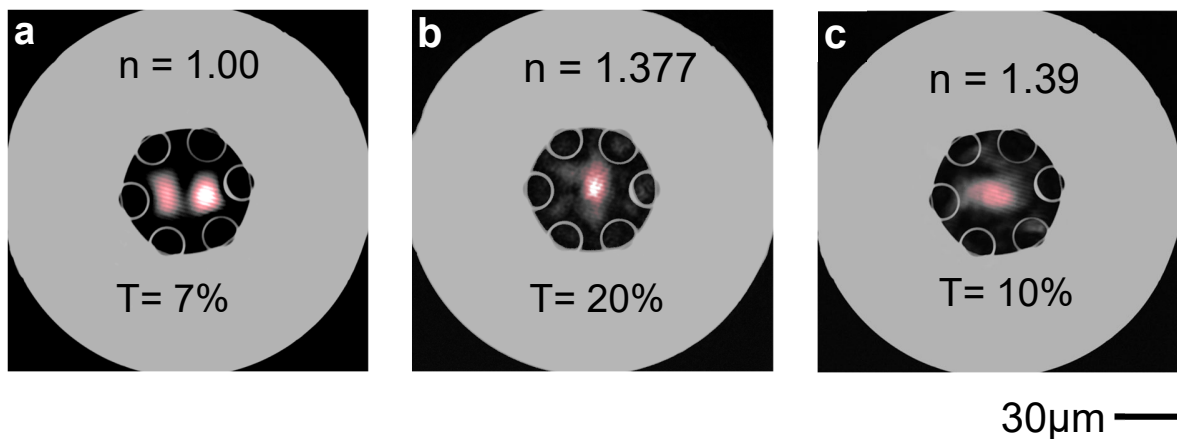

**Supplementary Figure 2 | Fibre transmission properties at 785 nm.** Transmitted optical modes at 785 nm for three filling materials with different refractive indices: (a) air, (b) IPA, and (c) EC:EMC (3:7). The CCD mode images are overlaid with optical microscope images taken in the same setup, using a white-light source to illuminate the glass cladding structure. The transmitted power was measured using a Si photodiode power meter with typical values between 10% and 20% for refractive indices between 1.37 and 1.42.

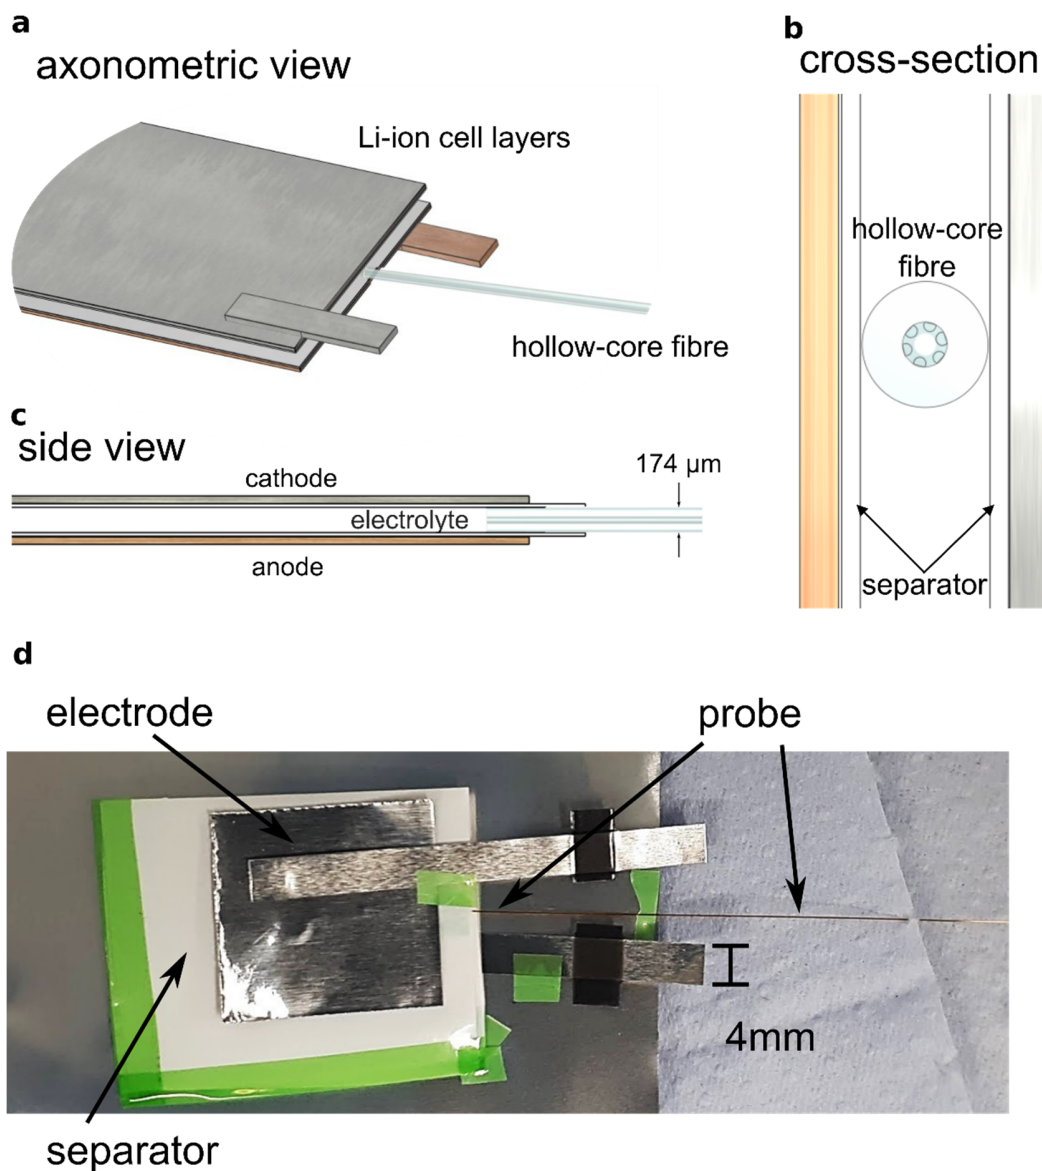

**Supplementary Figure 3 | Li-ion cell stack geometry and assembly.** (a-b) The hollow-core fibre is embedded in the electrolyte compartment, protected by two 25  $\mu\text{m}$ -thick layers of monolayer PE polymer separator (MTI). (c) Cross-section of the hollow-core fibre position within the cell. The outer diameter of the fibre is 174  $\mu\text{m}$ . (d) Photograph of cell assembly using square electrodes (as used for the multi-cycle experiment in **Figure 6**). An identical assembly method (but with circular electrodes) was used for the data in **Figures 3-5**.

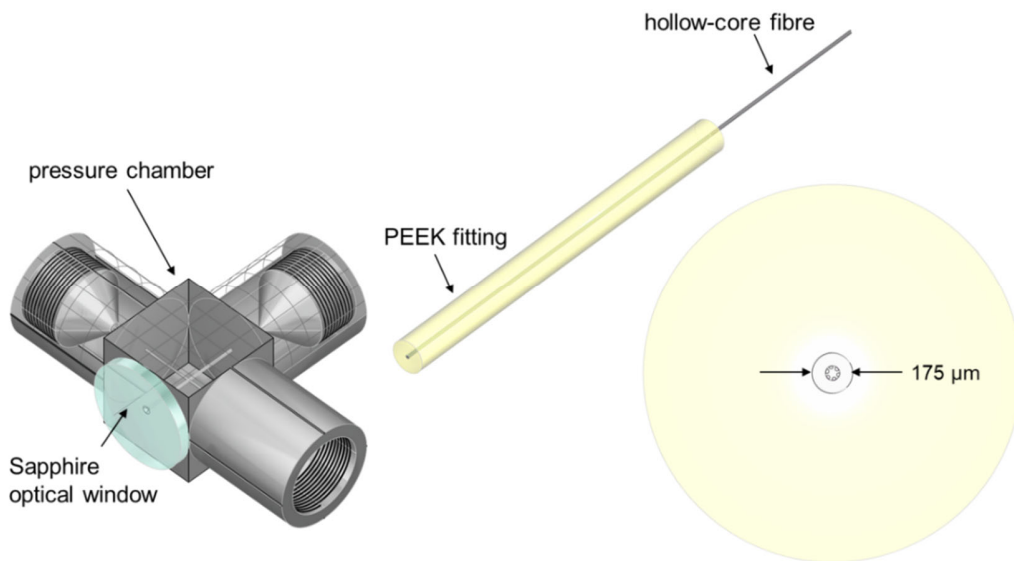

**Supplementary Figure 4 | Low dead-volume pressure chamber for light coupling and microfluidic actuation.** An HPLC (High Performance Liquid Chromatography) tee-connector (IDEX UH-422) is customized to connect the fibre to the syringe pump and allow optical access. A 1 mm thick sapphire optical access window (Edmund optics #43-366) is mounted to the cell using an optical adhesive. The fibre is connected to an access port by embedding it in a 1/16" outer diameter, 229 µm inner diameter PEEK sleeve (Upchurch F-227) and fixed with a finger-tight fitting (Upchurch F-120, not shown).

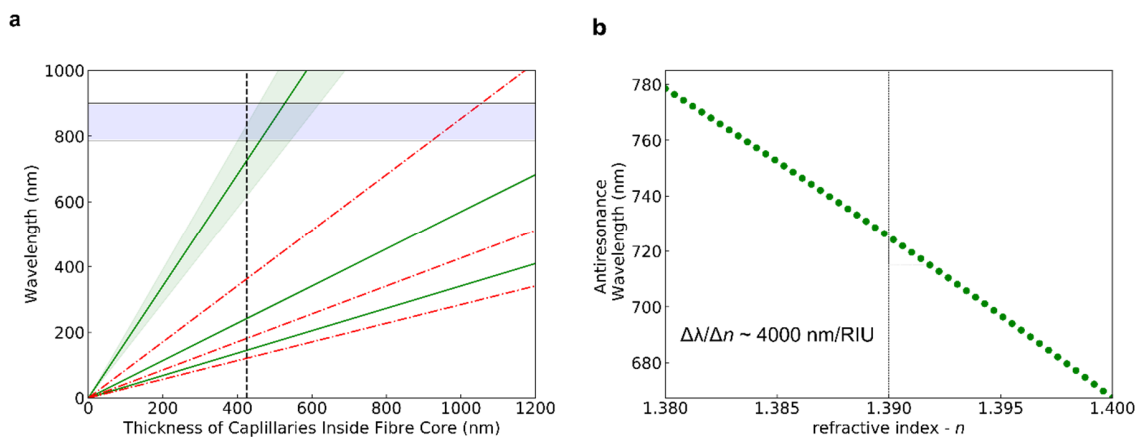

**Supplementary Figure 5 | Anti-resonance and resonance spectral position.** (a) Position of the anti-resonances (green lines) and resonances (red lines) of the fibre, as predicted by the ARROW model<sup>1</sup> for  $n_{\text{core}} = 1.39$  and  $n_{\text{glass}} = 1.454$ . The shaded band indicates a  $\sim 30\%$  spectral width of the first guidance band that is typical for ARROW waveguides.<sup>1</sup> The vertical dashed line indicates the average wall thickness of the capillaries in the fibre core (425 nm), the horizontal shaded band indicates the spectral region of interest (785 – 910 nm). The Raman band lies well above the first loss resonance ( $\lambda = 380 \text{ nm}$ ), and therefore reasonable guidance is expected. (b) Dependence of the anti-resonance position on liquid-core refractive index. The anti-resonance position shifts by  $-4000 \text{ nm per refractive index unit (RIU)}$ .

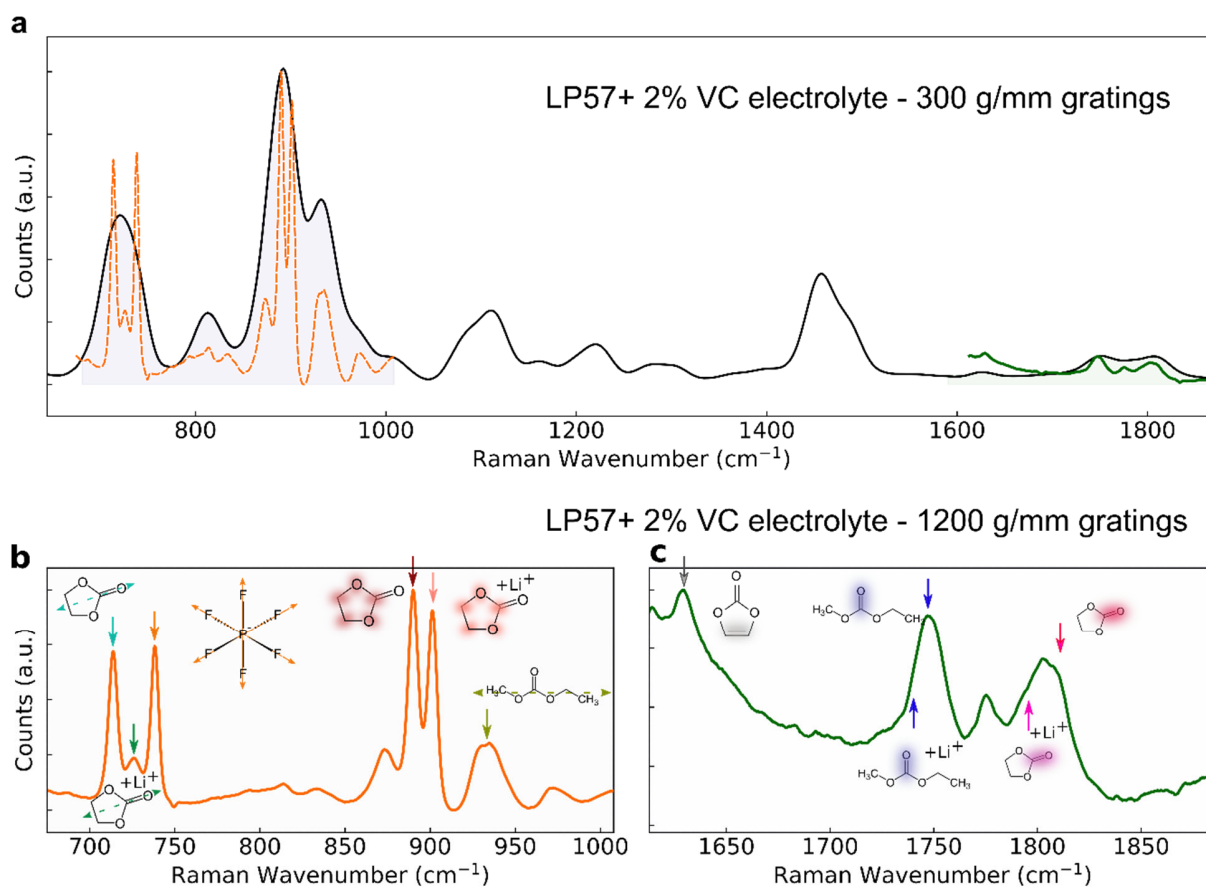

**Supplementary Figure 6 | High-resolution Raman spectra.** Comparison between high- and low-resolution ex situ Raman spectra on non-cycled electrolyte, obtained using low (300 g/mm, 190  $\mu\text{m}$  slit width, 27  $\text{cm}^{-1}$  resolution, black, **a**) and high (1200 g/mm, 90  $\mu\text{m}$  slit width, 2.4  $\text{cm}^{-1}$  resolution, orange/green, **b** and **c**) resolution settings. Raman vibrations of interest for Li-ion solvation studies are highlighted in the high-resolution Raman scans (**b** and **c**). The high-resolution spectra in **b** and **c** have also been added as orange dashed and green lines in **a**. The integration time was 20 s for all spectra.

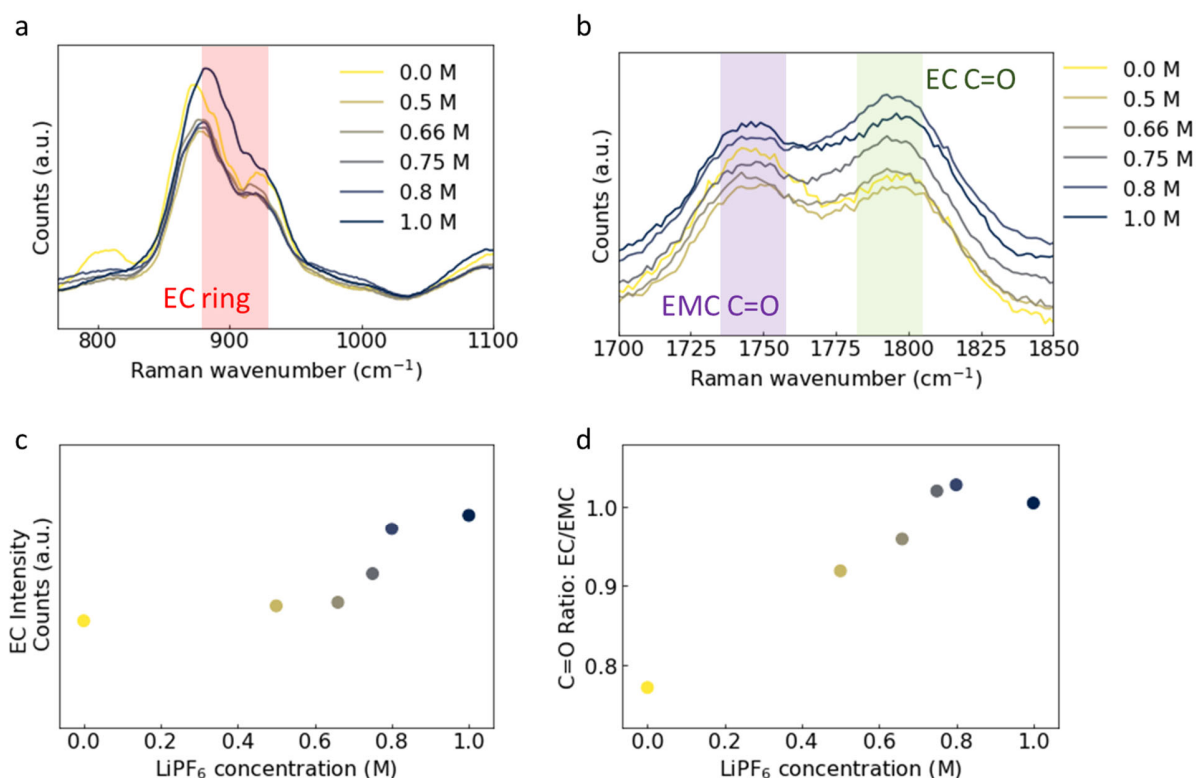

**Supplementary Figure 7 | Ex situ calibration of Raman response.** The effect of Li concentration on the EC/EMC Raman spectra is studied by infiltrating prepared solutions of LiPF<sub>6</sub> salt in EC:EMC (3:7 (v)) in the HC-fibre sensor. **(a-b)** The EC breathing mode (shaded area in **(a)**) and the EMC- and EC C=O stretch modes (shaded areas in **(b)**) are measured for a range of [LiPF<sub>6</sub>] concentrations between 0 and 1.0 M. The EC breathing mode **(c)** as well as the ratio between the EC and EMC (C=O) stretching modes **(d)** are observed to increase with [LiPF<sub>6</sub>].

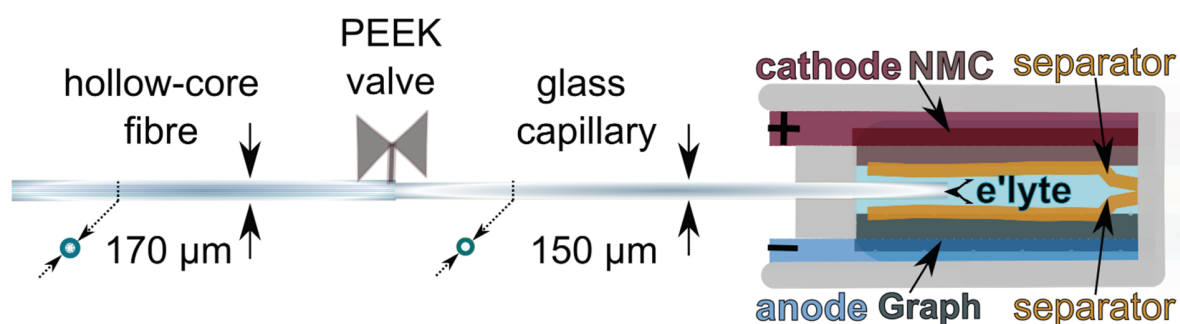

**Supplementary Figure 8 | Alternative microfluidic configuration for a Li-ion cell.** The drawing depicts the stack layers arrangement and the position of the coated glass capillary used for experiments discussed in **Figure 6** in the main text. This configuration allows for separation between the hollow-core used for Raman detection and the capillary used for sampling the LP57 (VC-free) electrolyte.

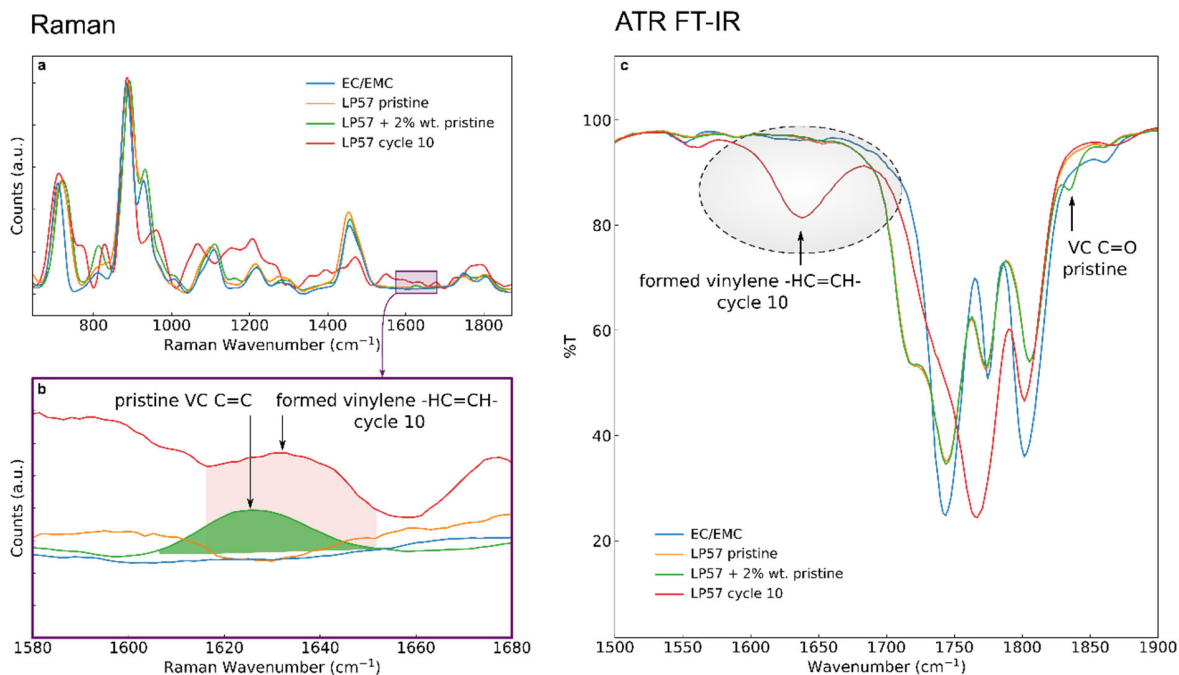

**Supplementary Figure 9 | Ex situ Raman and ATR FT-IR spectra.** Electrolyte samples were extracted from a coin cell (cell assembly, cycling parameters, and extraction procedure described in Methods section). Ex situ Raman spectra (a,b) were measured with the HC-fibre probe. ATR FT-IR spectra (c) were collected using a Shimadzu IRTracer-100 FT-IR spectrometer with QATR-10 ATR crystal.

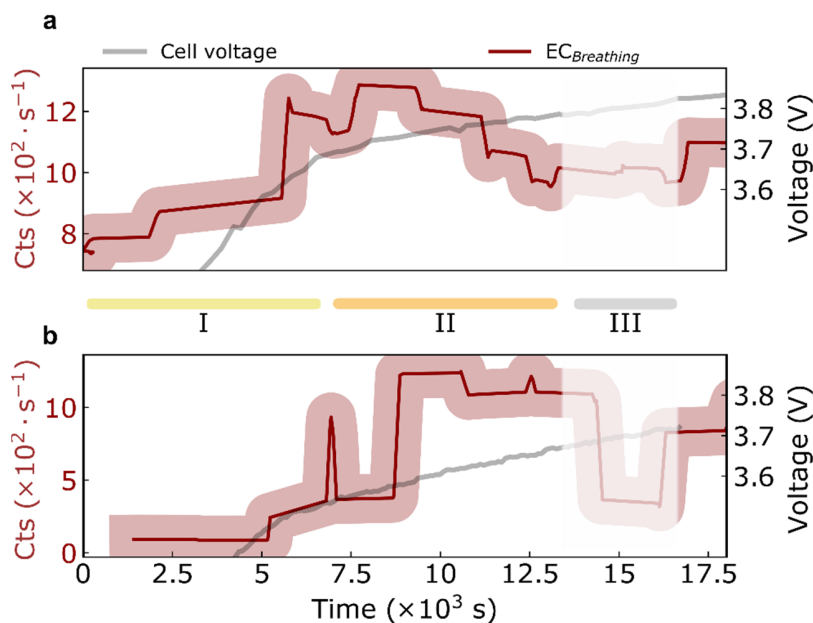

**Supplementary Figure 10 | Representative measurements on different Li-ion pouch cells.**

Both experiments in (a-b) display a step increase in EC breathing mode intensity during charging (as in Figure 3 in the main text), as well as a reduction in signal due to bubble formation at higher voltages (shaded areas). Sections I-III correspond to the same parts of the cycle as in Figure 4 (main text).

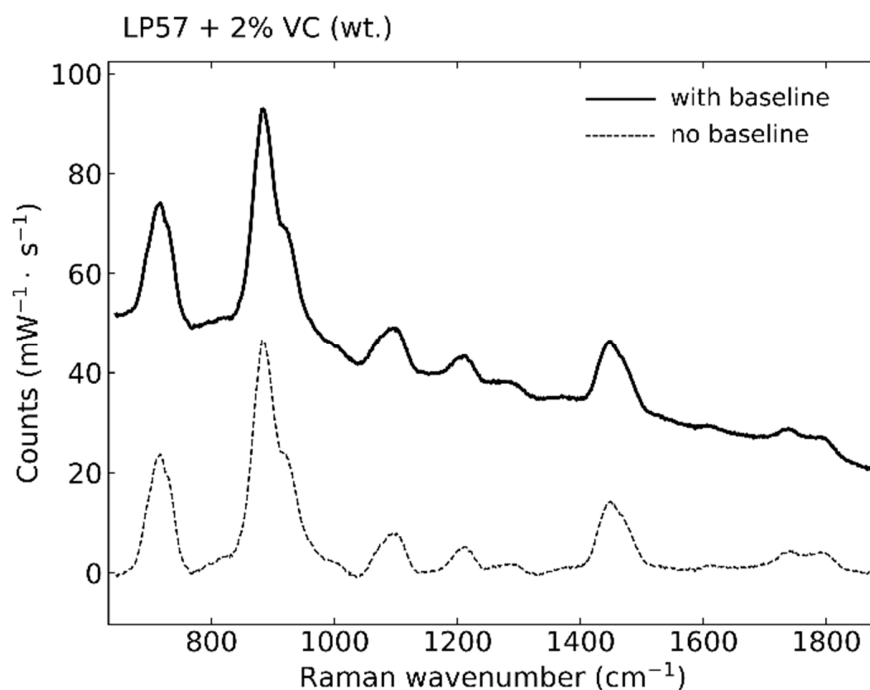

**Supplementary Figure 11 | Raman spectra pre-processing and baseline subtraction.** Comparison between LP57 +VC 2% wt. Electrolyte before (continuous line) and after (dashed line) baseline subtraction. For each spectrum, the baseline is fitted with an order three polynomial curve. A Savitzky–Golay filter (window size 21 points, order 3) is finally applied to smooth the spectra. Counts are referenced to the input power of the pump laser.

## References

1. Litchinitser, N. M., Abeeluck, A. K., Headley, C. & Eggleton, B. J. Antiresonant reflecting photonic crystal optical waveguides. *Opt. Lett.* **27**, 1592–1594 (2002).
2. Thompson, L. M. *et al.* Quantifying Changes to the Electrolyte and Negative Electrode in Aged NMC532/Graphite Lithium-Ion Cells. *J. Electrochem. Soc.* **165**, A2732 (2018).
